# Supplementary material for: Stable climate simulations using a realistic general circulation model with neural network parameterizations for atmospheric moist physics and radiation processes
Source: Copernicus journal article supplement (doi:10.5194/gmd-15-3923-2022), 2022-05-16
Supplement: Supplementary file 1 [file gmd-15-3923-2022-supplement.zip]

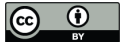

*Supplement of*

**Stable climate simulations using a realistic general circulation model with neural network parameterizations for atmospheric moist physics and radiation processes**

**Xin Wang et al.**

*Correspondence to:* Wei Xue (xuewei@tsinghua.edu.cn) and Yilun Han (hanyl16@mails.tsinghua.edu.cn)

- [gmd-15-3923-2022-supplement-title-page.pdf](#)
- [supplement](#)
  - [Movie S1 new.gif](#)
  - [Movie S2 new.gif](#)
  - [Supporting.Material.pdf](#)

The copyright of individual parts of the supplement might differ from the article licence.
